# Supplementary material for: Macrophage global metabolomics identifies cholestenone as host/pathogen cometabolite present in human Mycobacterium tuberculosis infection
Source: JCI journal article supplement (doi:10.1172/jci152509), 2022-01-31
Supplement: sd1 [file 1]

# 1 **SUPPLEMENTAL MATERIAL**

## 2 **Supplemental Text**

### 3 **Global metabolomics profiling**

4 We performed global metabolite profiling to assess the effect of Mtb infection. Principle  
5 component Analysis (PCA) revealed a clear separation based on macrophage infection status  
6 at both the early and later time points (**Supplemental Figure 1**). We observed that Mtb  
7 infection induced major metabolic perturbations in glucose and cholesterol metabolism,  
8 itaconate production, and redox homeostasis. Here we discuss important observations in detail  
9 to supplement results shown in the main text.

#### 10 **(i) Nucleotide sugars**

11 Glucose-6-phosphate can be shuttled for the synthesis of nucleotide sugars. We observed  
12 increased levels of UDP-glucose and UDP-glucuronate in TB versus Ctrl comparison at both  
13 time points (**Supplemental Figure 2**). These metabolites are often used in protein and lipid  
14 glycosylation reactions, which in the case of macrophages includes plasma membrane  
15 components or proteins destined for export. Nucleotide sugars can also serve as substrates  
16 for bacterial glycosyltransferases, which are important for cell wall synthesis.

#### 17 **(ii) Perturbations in redox homeostasis**

18 Macrophage innate immune response involves increased formation of reactive oxygen and  
19 nitrogen species (ROS/RNI), which can alter redox balance. Mtb infected macrophages had  
20 elevated levels of citrulline levels early after infection (**Supplemental Figure 3A**). This reflects  
21 the activity of iNOS, which converts arginine to citrulline and NO. This was accompanied by  
22 significant increases in dihydrobiopterin, which represent oxidized forms of tetrahydrobiopterin,  
23 a cofactor in NO synthesis (**Supplemental Figure 3B**). Mtb-infected macrophages  
24 experienced oxidative stress, accompanied by increases in gamma-glutamyl amino acids (e.g.,

25 gamma-glutamylglutamine) in infected cells at both time points tested (**Supplemental Figure**  
26 **3C**). Gamma-glutamyl amino acids are formed when the enzyme gamma-glutamyl  
27 transpeptidase transfers the gamma-glutamyl moiety of glutathione to acceptor amino acids.  
28 Evidence of oxidative stress experienced by intracellular Mtb was also suggested by marked  
29 accumulation of histidine betaine (hercynine) in all infected cells. This compound is a bacterial  
30 metabolite that serves as a precursor to ergothioneine, an antioxidant that enables Mtb to  
31 withstand oxidative stress of the intracellular milieu (**Supplemental Figure 3D**)

32 **(iii) Other notable changes**

33 We observed elevated 1-methyl-5-imidazoleacetate in all infected samples compared to  
34 controls (**Supplemental Figure 4A**). The expression of histidine decarboxylase (HDC) can be  
35 induced in macrophages by inflammatory stimuli resulting in formation of histamine.  
36 Interestingly, elevated serotonin was also observed in TB versus Ctrl 24 hpi (**Supplemental**  
37 **Figure 4B**).

## Supplemental Methods

### 38 **Global metabolomics profiling**

39 **Metabolite Quantification and Data Normalization:** Peaks were quantified using area-  
40 under-the-curve. For studies spanning multiple days, a data normalization step was performed  
41 to correct variation resulting from instrument inter-day tuning differences. Essentially, each  
42 compound was corrected in run-day blocks by registering the medians to equal one (1.00) and  
43 normalizing each data point proportionately (termed the “block correction”). For studies that  
44 did not require more than one day of analysis, no normalization is necessary, other than for  
45 purposes of data visualization. In certain instances, biochemical data may have been  
46 normalized to an additional factor (e.g., cell counts, total protein as determined by Bradford  
47 assay, osmolality, etc.) to account for differences in metabolite levels due to differences in the  
48 amount of material present in each sample.

49 **Data analysis:** The presented dataset comprises a total of 507 compounds of known identity  
50 (**Supplemental Table 1**). For each biochemical, the “OrigScale” values are the area under the  
51 curve values for each peak. Each biochemical in OrigScale was rescaled to set the median  
52 equal to 1, which was referred to as ScaledImpData or scaled intensity in the box plots. Log  
53 transformation and imputation of missing values, if any, was done with the minimum observed  
54 value for each compound, ANOVA contrasts were used to identify biochemicals that differed  
55 significantly between experimental groups. A summary of the numbers of biochemicals that  
56 achieved statistical significance ( $p \leq 0.05$ ), as well as those approaching significance  
57 ( $0.05 < p < 0.10$ ), is shown indicated in **Supplemental Table 1**. Analysis by ANOVA identified  
58 biochemicals exhibiting significant interaction and main effects for experimental parameters of  
59 infection and timepoint. An estimate of the false discovery rate (q-value) was calculated to take

60 into account the multiple comparisons that normally occur in metabolomic-based studies  
61 **(Supplemental Table 1)**.

62

### 63 **Molecular biology**

64 Plasmid extractions and DNA purifications were done using the QIAprep spin Miniprep Kit  
65 (Qiagen) and QIA quick PCR purification kit (Qiagen) respectively, according to the  
66 manufacturer's instructions. Polymerase chain reactions (PCR) were carried out using the high  
67 fidelity Phusion DNA polymerase (New England BioLabs). When mentioned, one-step  
68 assembly of linear vectors and inserts were carried out using the NEBuilder HiFi DNA Assembly  
69 kit (New England BioLabs). Restriction enzymes were used according the manufacturer's  
70 instructions. Plasmids and primers used in this study can be found in **Supplemental Table 5**  
71 and **6**. The pKM464 plasmid was a gift from Kenan Murphy (Addgene plasmid # 108322). The  
72 pKM461 plasmid was a gift from Kenan Murphy (Addgene plasmid # 108320). Extraction of  
73 genomic DNA was done by cetyltrimethylammonium bromide-lysozyme lysis, followed by  
74 chloroform-isoamyl alcohol extraction and isopropanol precipitation, as previously described  
75 (1).

76

### 77 **Construction of mutants and complemented strains**

78 *Rv1106c/3 $\beta$ -hsd* and *Rv3409c/choD* were deleted in the H37Rv strain using plasmids pKM461  
79 and pKM464 (**Supplemental Table 5**), and HC291 or HC292 primers (**Supplemental Table**  
80 **6**), respectively, using the ORBIT method described in (2). The HC291 and HC292 primers  
81 were designed according to the rules described in (2), with homology regions annealing  
82 upstream and downstream of the target gene flanking an *attP* site. For the construction of the  
83  $\Delta$ *hsd* mutant, H37Rv containing pKM461 was grown in liquid media and incubated with

84 anhydrous tetracycline (500 ng/mL) for 16-20 hours before co-electroporation of HC292 and  
85 pKM464. Hygromycin-resistant colonies were screened for integration of pKM464 in the  
86 Rv1106c open reading frame by PCR using primers HC338/HC343 (**Supplemental Table 6**),  
87 leading to amplification of DNA fragments of 3500 bp in the mutant and 1500 bp in the parental  
88 strain. For deletion of *choD* (Rv3409c), we electroporated HC291 and pKM464 in H37Rv  
89 containing pKM461. Insertion of pKM464 in *Rv3409c* was verified by PCR using oligos HC336  
90 and HC342 (**Supplemental Table 6**), which amplify fragments of 3440 bp in the mutant and  
91 2090 bp in the parental strain.

92

93 Due to the complexity of the genetic region of Rv1106c, complementation of the  $\Delta hsd$  mutant  
94 was designed by cloning the entire operon on an integrative plasmid, starting from the  
95 intergenic region upstream of Rv1109c, followed by Rv1108c (*xseA*), Rv1107c (*xseB*) and  
96 Rv1106c. Primers HC354/HC357 were used to amplify a 3500 bp DNA fragment from pKP617.  
97 Using primers HC353/HC356, the 3500 bp genetic region of from Rv1109c-Rv1106c was  
98 amplified from H37Rv genomic DNA and subsequently assembled with the linearized fragment  
99 of pKP617 using NEBuilder HiFi DNA Assembly, leading to plasmid pCH89. Correct assembly  
100 of pCH89 was confirmed by enzymatic restriction, and the full insert was sequenced to confirm  
101 no mutations were introduced. The pCH89 complementation plasmid was then electroporated  
102 in H37Rv (pKM461) and  $\Delta hsd$  (pKM461, pKM464).

103

#### 104 **Cholestenone concentration determination**

105 For data reported in Figure 3B and Figure 4G, 4-cholesten-3-one was quantified on a Q  
106 Exactive mass spectrometer. Data processing was conducted with Xcalibur 4.2 and the area  
107 ratio of 4-cholesten-3-one to the internal standard ( $d_5$ -4-cholesten-3-one) was used to

108 determine the 4-cholesten-3-one concentration. All other cholestenone measurements  
109 (Figures 3B, 3C, 3E; Figures 4C, 4E, 4F; Figures 5-7) were performed on a 4000QTRAP mass  
110 spectrometer. In these cases, the 4-cholesten-3-one concentration was calculated by  
111 converting the area ratio to concentration with a standard curve (**Supplemental Figure 6A**).  
112 The standard curve was obtained by analysis of samples containing 4-cholesten-3-one (0.01  
113 ng/mL to 1000 ng/mL) in 80% methanol with 0.2  $\mu\text{g/mL}$   $\text{d}_5$ -4-cholesten-3-one. Samples were  
114 analyzed in technical duplicates with a 4000QTRAP mass spectrometer. The standard curve  
115 was established using the software Analyst 1.6.3 (AB Sciex, Vaughan, Canada). For plasma  
116 and sputum samples, the concentration was subsequently corrected to take into account the  
117 sample dilution introduced by sample processing (5-fold and 10-fold, respectively). Throughout  
118 the manuscript, metabolite abundance is reported from unprocessed samples (plasma or non-  
119 liquefied sputum). The standard curve was >96% accurate for values above 2.5 ng/mL for  
120 plasma and 5 ng/mL for sputum. 29 sputum samples (25 TB negative; 4 TB positive) fell below  
121 this accuracy threshold, so were adjusted to 5 ng/ml for further statistical analysis. This  
122 conservative adjustment means that differences between groups is an underestimate of the  
123 true difference.

124

### 125 **Cholesterol estimation and cell viability assay**

126 Total cholesterol, total protein, and cell viability were measured using Amplex Red Cholesterol  
127 Assay kit (Invitrogen cat. No. A12216), Pierce BCA Protein Assay Kit (Thermofisher Scientific  
128 cat. No. 23252), and CellTiter Glo Luminescent Cell Viability Assay kit (Promega cat. No.  
129 G9241), respectively.

130

### 131 **Statistical analysis**

132 Violin plots and ROC plots were generated using RStudio version 1.3.1073 (3), with the  
133 following packages: ggplot2 (4), pROC (5), ggpubr (6), and egg (7).

134

### 135 **Supplemental References**

- 136 1. Larsen MH, Biermann K, Tandberg S, Hsu T, and Jacobs WR. Genetic Manipulation of  
137 *Mycobacterium tuberculosis*. *Curr Protoc Microbiol*. 2007;Chapter 10:Unit 10A.2.
- 138 2. Murphy KC, Nelson SJ, Nambi S, Papavinasasundaram K, Baer CE, and Sasseti CM.  
139 ORBIT: a New Paradigm for Genetic Engineering of Mycobacterial Chromosomes.  
140 *mBio*. 2018;9(6).
- 141 3. R StudioTeam. RStudio: Integrated Development Environment for R. RStudio, PBC,  
142 Boston, MA (2020). URL <http://www.rstudio.com/>.
- 143 4. Wickham H (2016). ggplot2: Elegant Graphics for Data Analysis. Springer-Verlag New  
144 York. ISBN 978-3-319-24277-4, <https://ggplot2.tidyverse.org>.
- 145 5. Robin X, N. Turck N, Hainard A, Tiberti N, Lisacek F, Sanchez JC and Müller M.  
146 pROC: an open-source package for R and S+ to analyze and compare ROC curves.  
147 *BMC Bioinformatics*, 12, p. 77. (2011)
- 148 6. Kassambara A. ggpubr: 'ggplot2' Based Publication Ready Plots. (2020). R package  
149 version 0.4.0. <https://CRAN.R-project.org/package=ggpubr>
- 150 7. Auguie B. egg: Extensions for 'ggplot2': Custom Geom, Custom Themes, Plot  
151 Alignment, Labelled Panels, Symmetric Scales, and Fixed Panel Size. (2019) R  
152 package version 0.4.5. <https://CRAN.R-project.org/package=egg>
- 153 8. Köster S, Upadhyay S, Chandra P, Papavinasasundaram K, Yang G, Hassan A, et al.  
154 *Mycobacterium tuberculosis* is protected from NADPH oxidase and LC3-associated

155 phagocytosis by the LCP protein CpsA. *Proc Natl Acad Sci U S A*.  
156 2017;114(41):E8711-E20.

157

158 **Supplemental Figures**

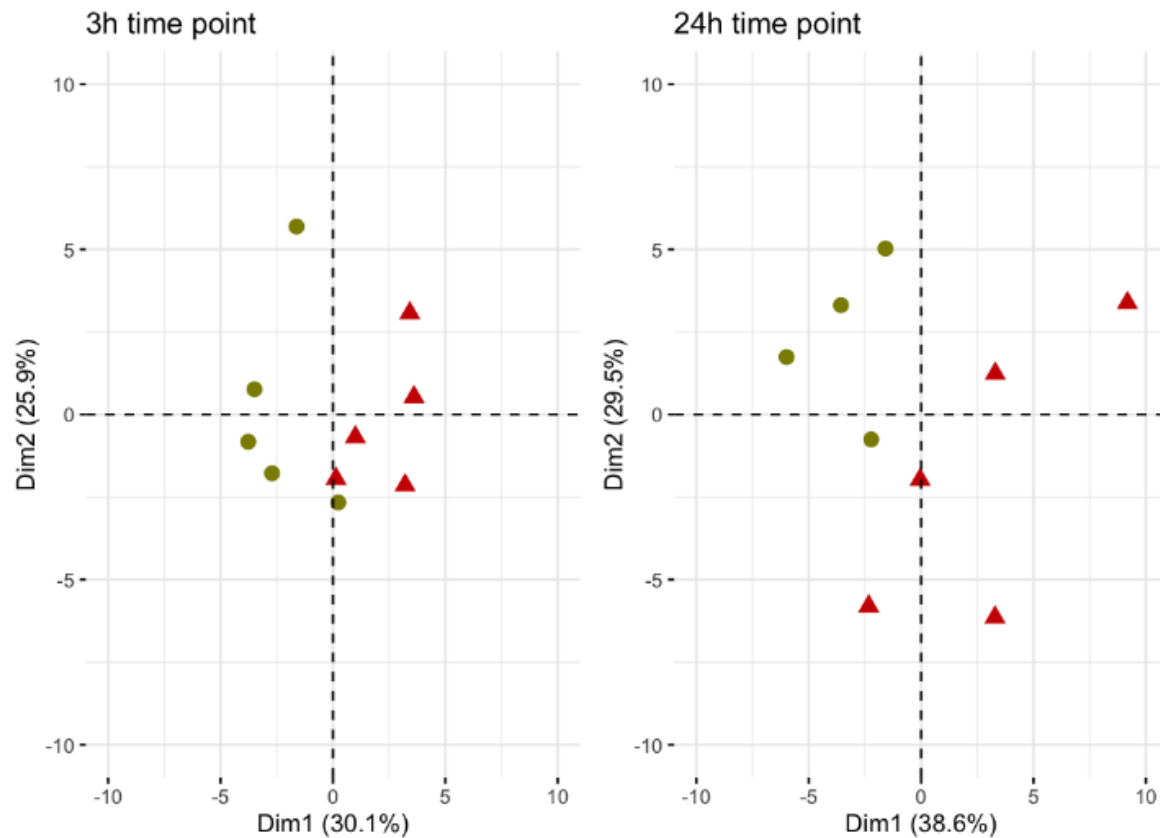

**Supplemental Figure 1.** Principal component analysis (PCA) of global metabolomics data showed a clear separation between uninfected (green circles) and Mtb-infected (red triangles) macrophages at both time points. Each point in the plot represents a replicate for a sample group. For each group, we used 5 replicates to generate results. One of five replicates for the uninfected 24h group was considered an outlier, and was excluded from subsequent analyses.

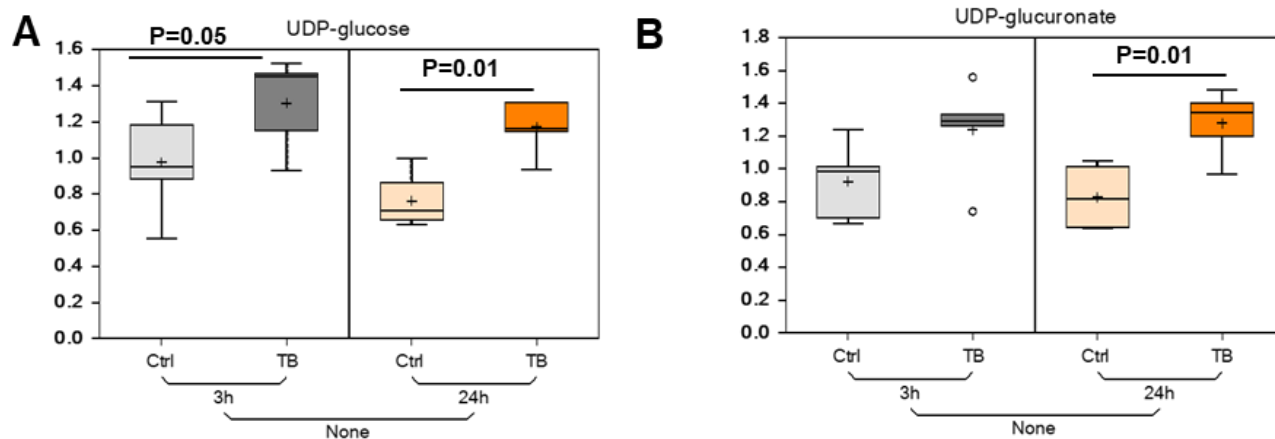

**Supplemental Figure 2. Infection-induced increases in nucleotide sugars.** The box plots show levels of **(A)** UDP-glucose and **(B)** UDP-glucuronate in uninfected (Ctrl) and Mtb-infected (TB) macrophages 3 and 24 hpi. Metabolite levels are shown in box plots as scaled intensity. For each metabolite, the raw area counts were rescaled to set the median equal to 1. Plots show median as a line and mean as '+'. Open circles show extreme data points in the group. Data analysis was done by ANOVA.

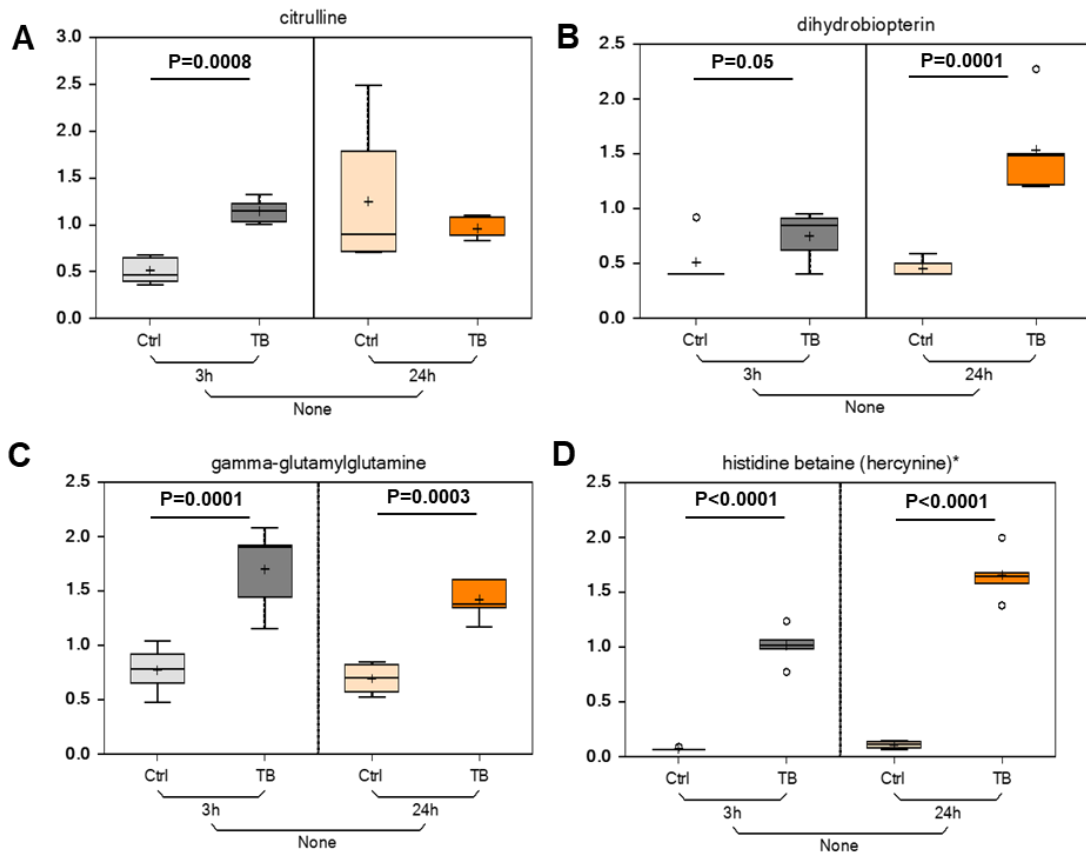

**Supplemental Figure 3. Infection-induced perturbations in redox homeostasis.** Box plots showing scaled intensity for **(A)** citrulline **(B)** dihydrobiopterin **(C)** gamma-glutamylglutamine and **(D)** histidine betaine (hercynine) in uninfected (Ctrl) and Mtb-infected (TB) macrophages 3 and 24 hpi. Box plots show median as a line and mean as '+'. Open circles show extreme data points. Analysis was done by ANOVA.

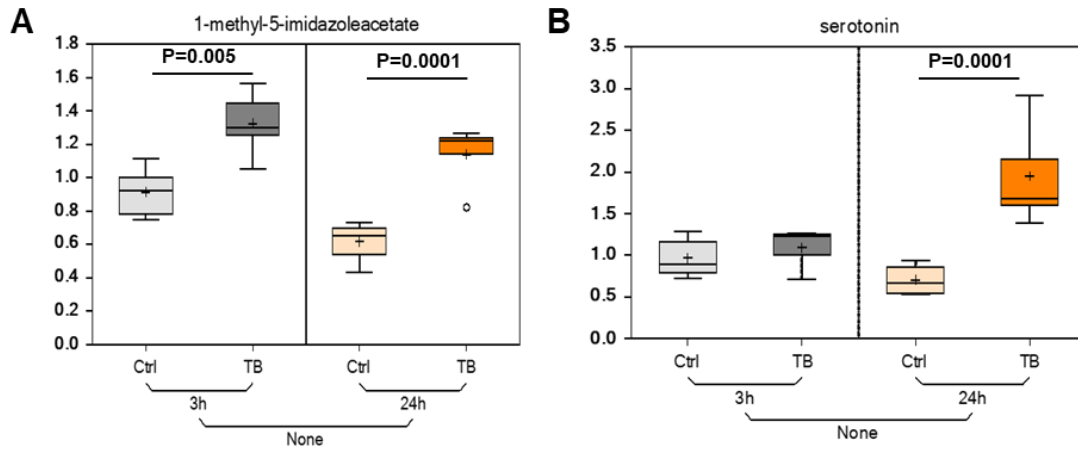

**Supplemental Figure 4. Other changes induced by Mtb infection of macrophages.** We observed significant elevations in levels of **(A)** 1-methyl-5-imidazoleacetate and **(B)** serotonin in TB versus Ctrl 24hpi. Box plots show indicated metabolite levels as scaled intensity, median as a line, and mean as '+'. Open circles show extreme data points. Analysis was done by ANOVA. Ctrl=uninfected, TB=Mtb-infected.

**A**

RT: 0.00 - 6.50

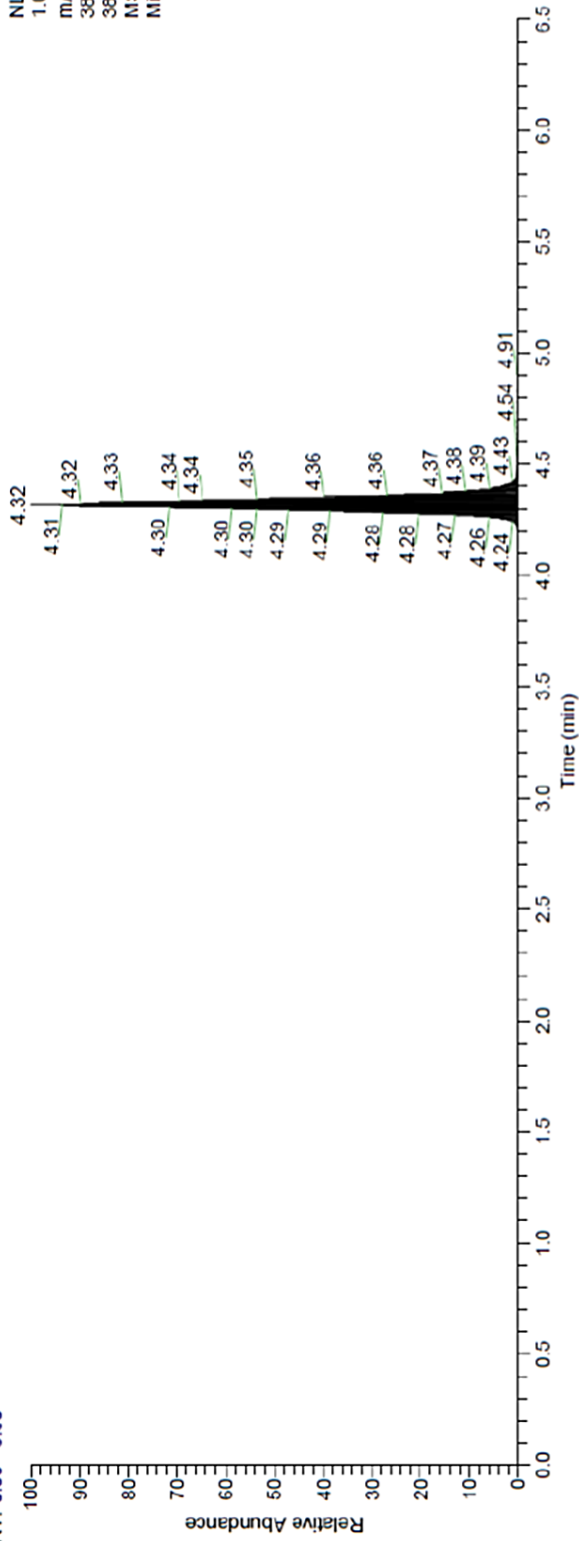

NL:  
1.02E7  
m/z=  
385.3434-  
385.3472  
MS  
Mix\_stds

Mix\_stds #1695 RT: 4.33 AV: 1 NL: 8.59E6  
T: FTMS + p ESI Full ms2 385.3465@hcd25.00 [50.0000-410.0000]

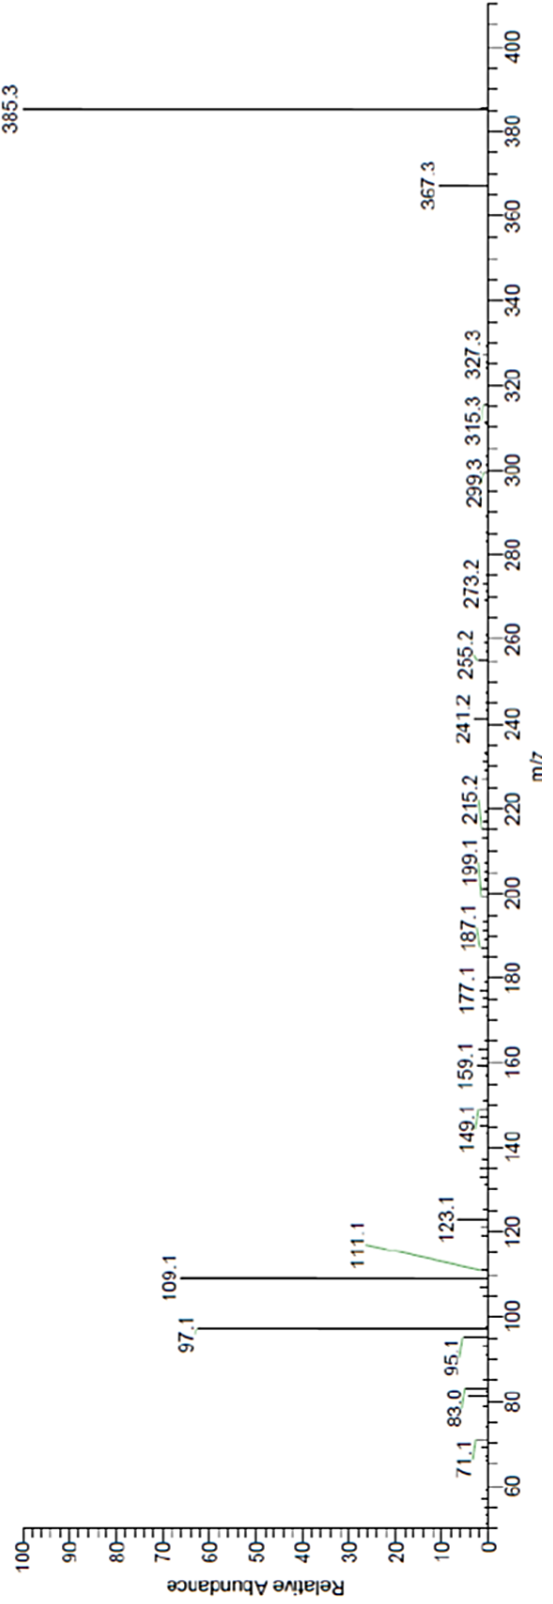

**B**

RT: 0.00 - 6.50

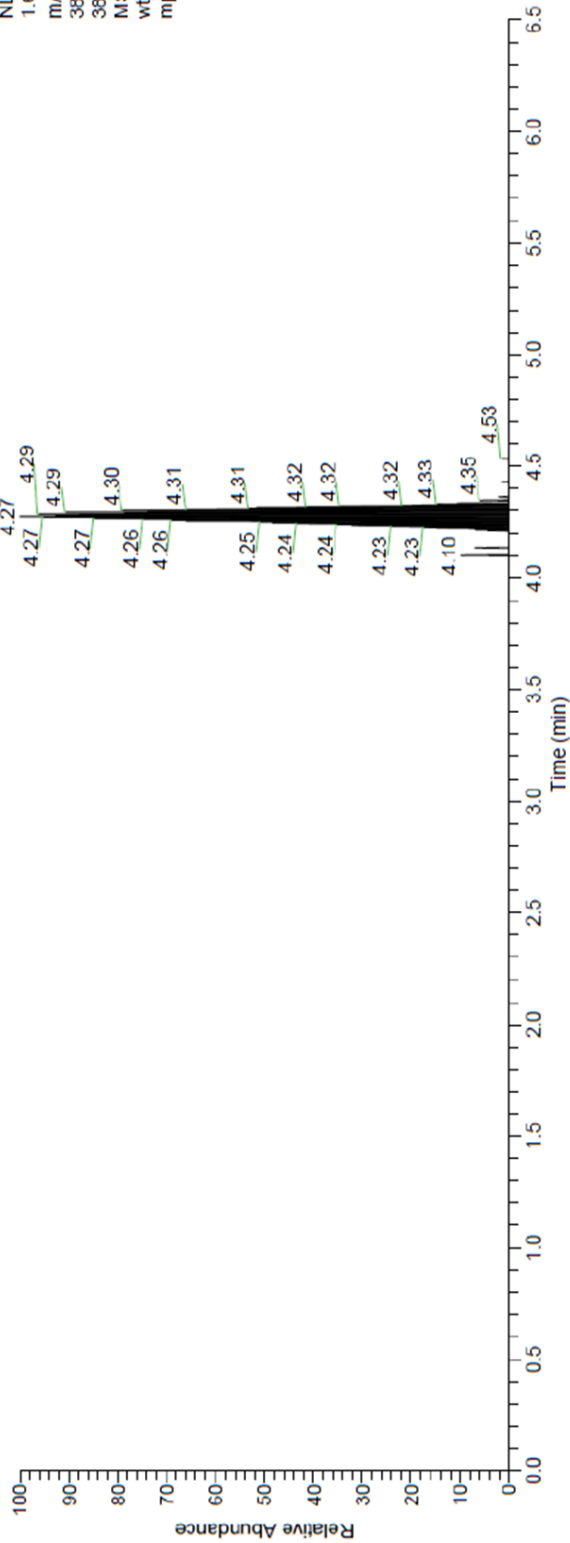

NL: 1.66E5  
m/z= 385.3434-385.3472  
MS  
wt\_10ng\_samp1

wt\_10ng\_sample1 #1671 RT: 4.27 AV: 1 NL: 1.33E5  
T: FTMS + p ESI Full ms2 385.3465@hcd25.00 [50.0000-410.0000]

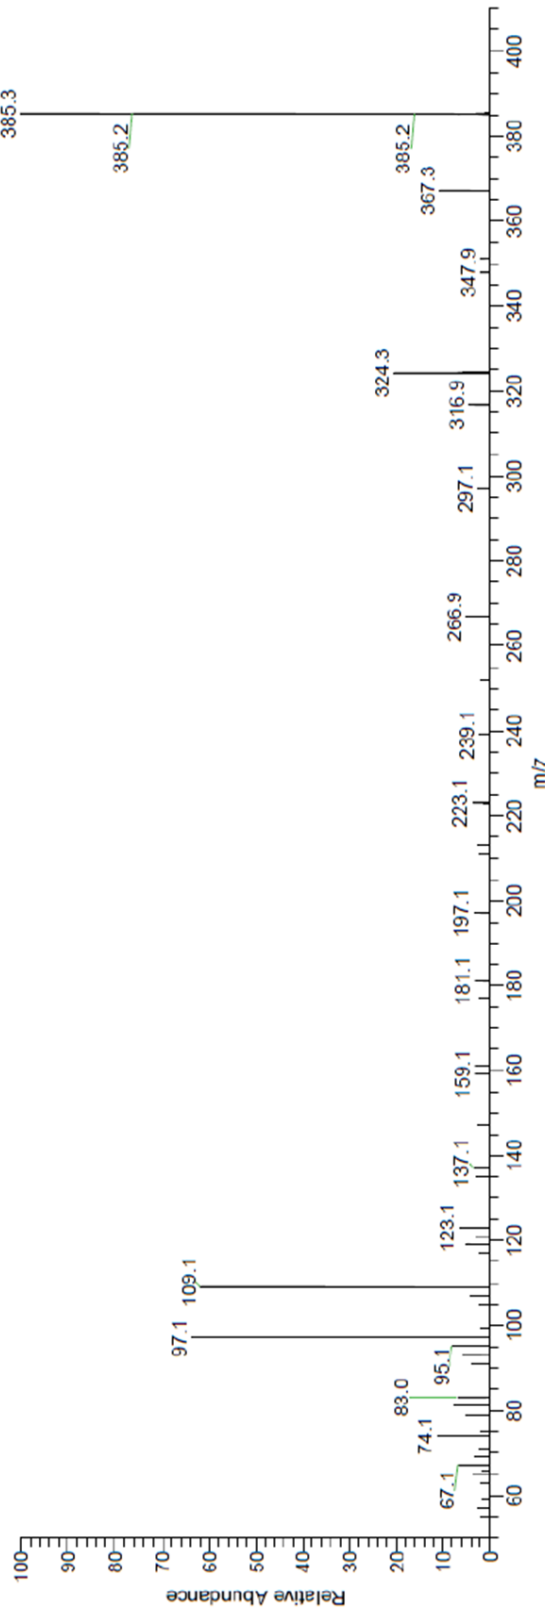

C

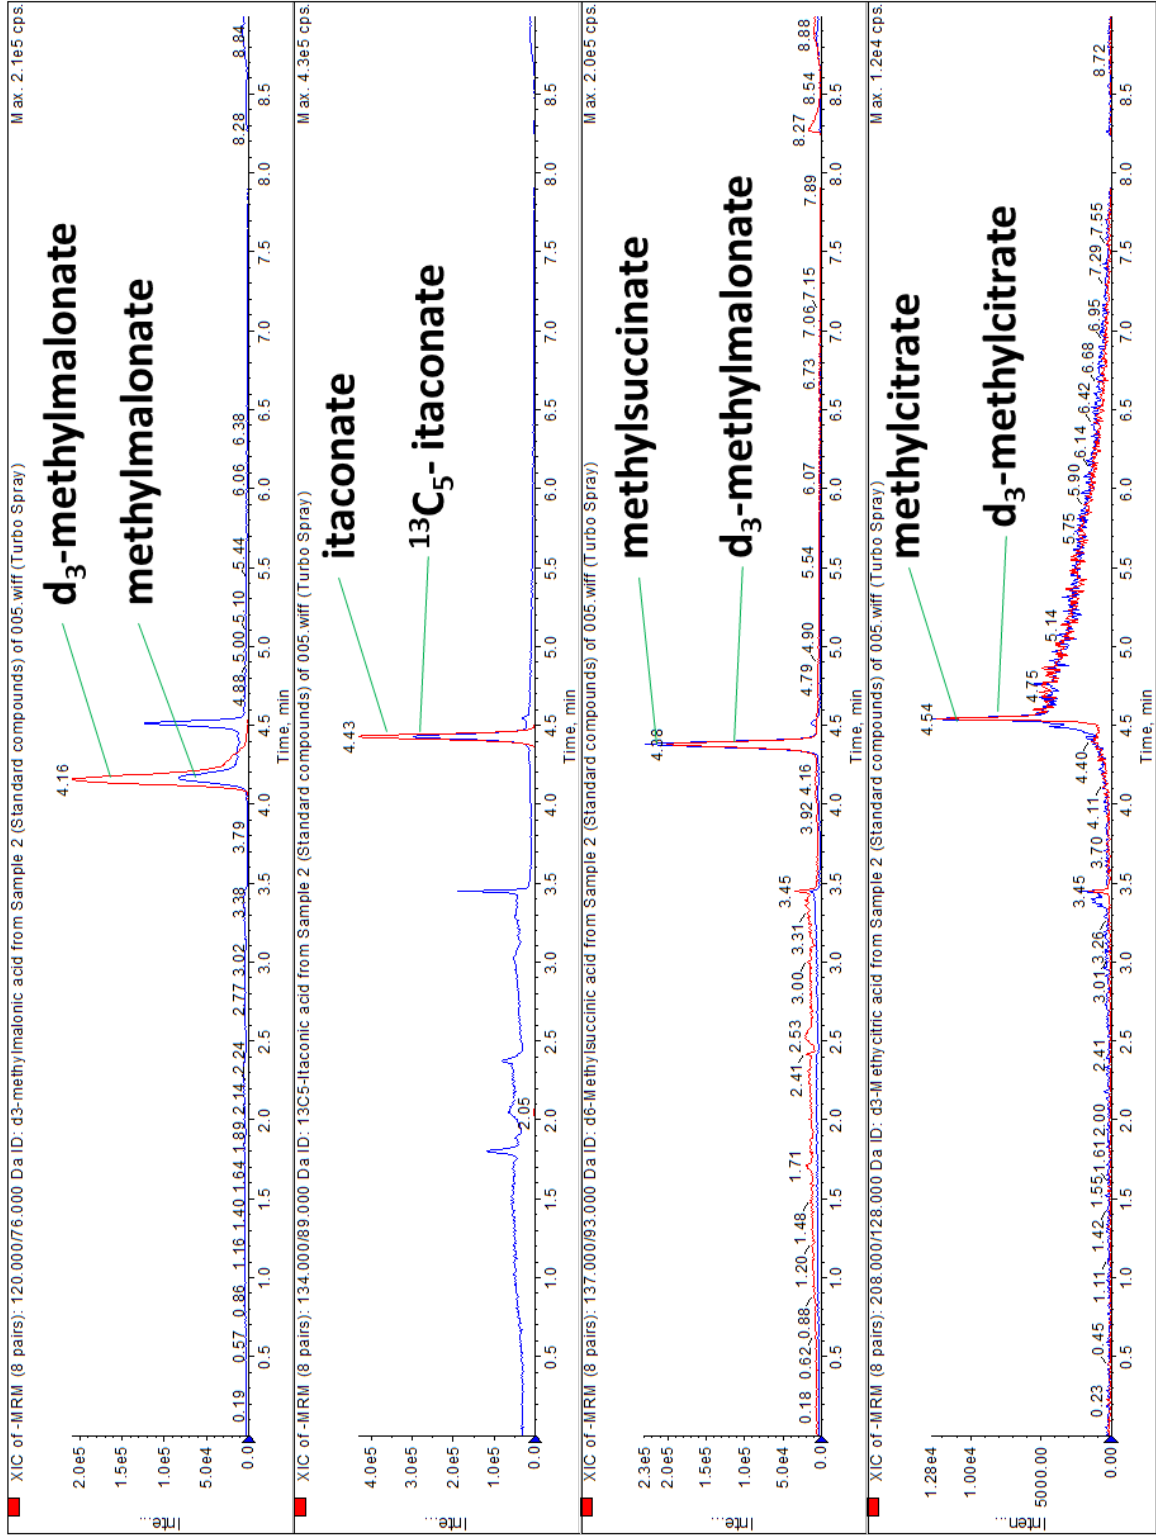

D

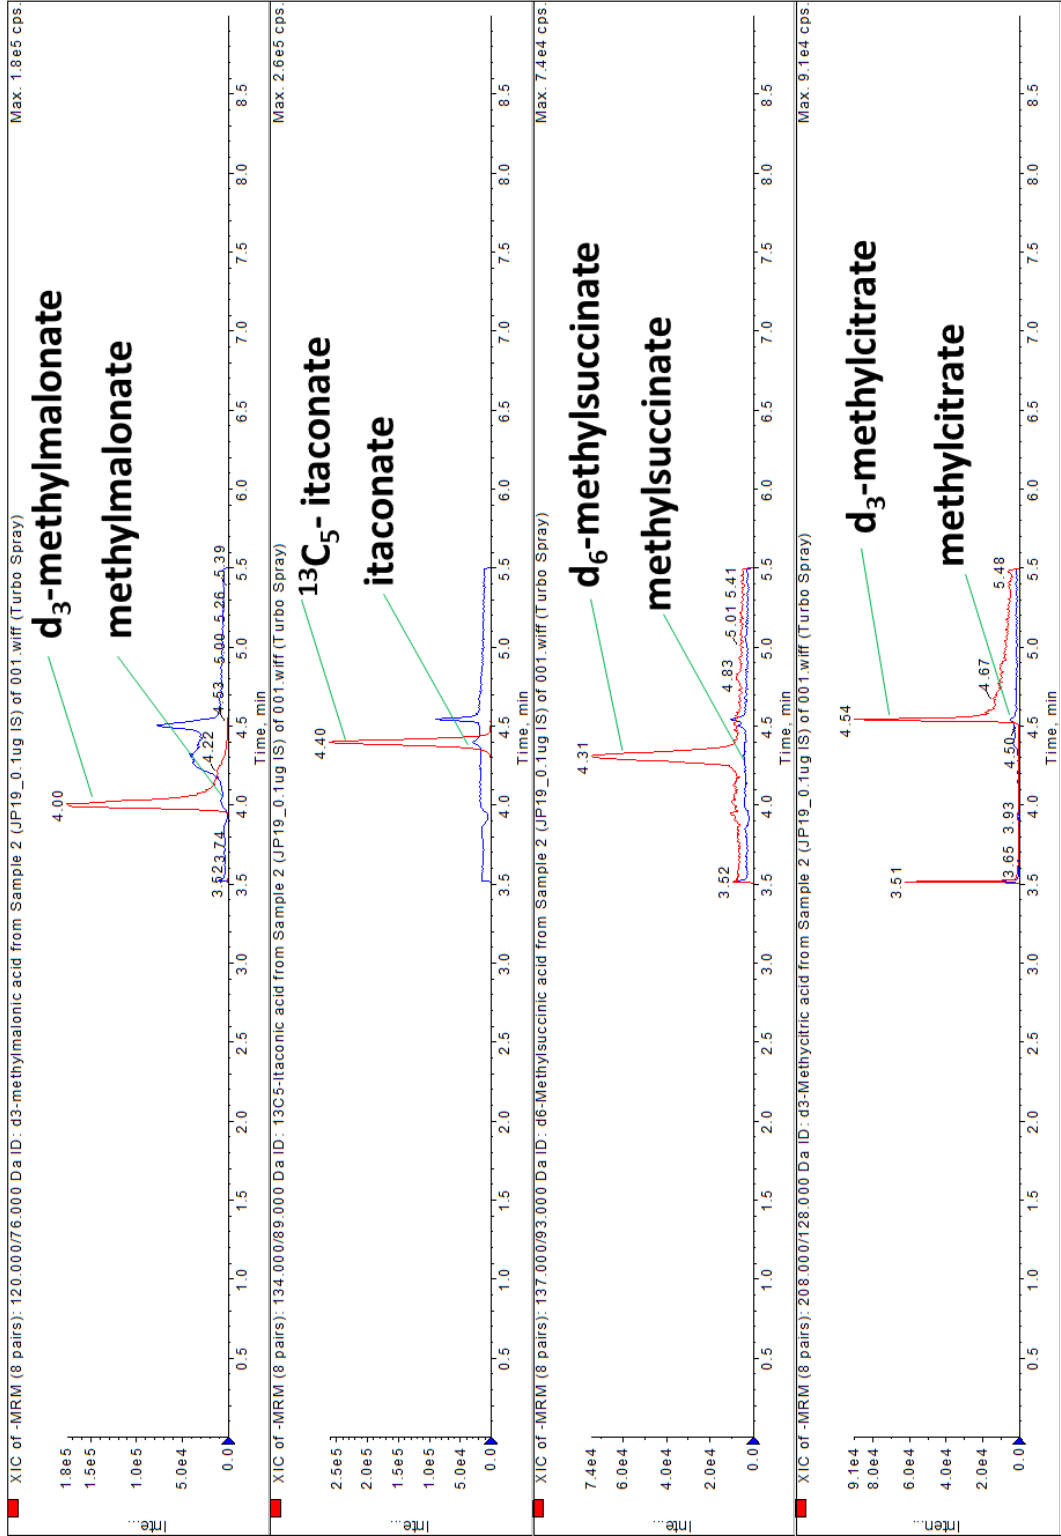

**Supplemental Figure 5. Mass spectrometry validation of reported metabolites. (A)** Chromatogram and mass spectrometry spectra of the 4-cholesten-3-one reference compound. **(B)** Chromatogram and mass spectrometry spectra of 4-cholesten-3-one in macrophage extracts. **(C)** Combined chromatograms for the methylmalonate, itaconate, methylsuccinate, methylcitrate standard compounds (shown in blue) and their respective internal standards (shown in red). **(D)** Combined chromatograms for the methylmalonate, itaconate, methylsuccinate, and methylcitrate metabolites identified from macrophage extracts (shown in blue) with their respective internal standards (shown in red).

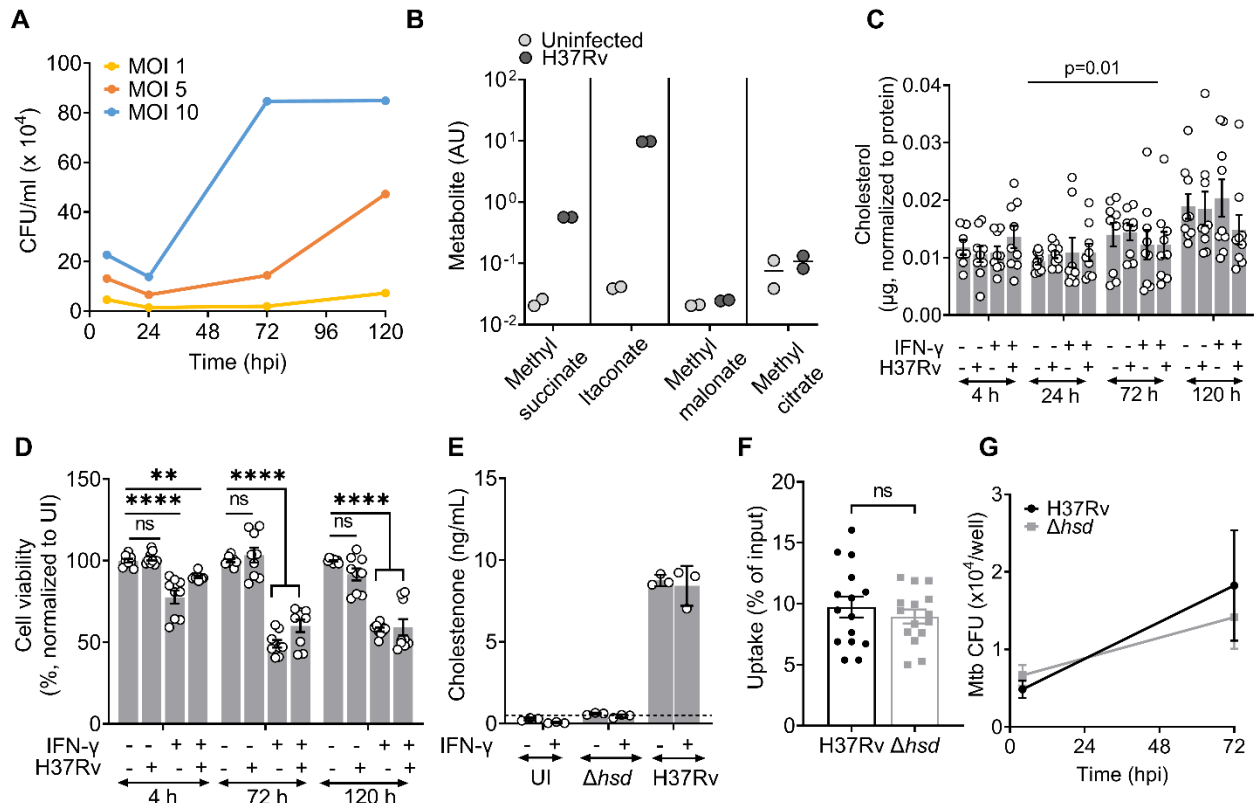

**Supplemental Figure 6. *M. tuberculosis* infection of BMDM: colony forming units (CFU), metabolite levels, and cell viability.** (A) Mtb CFU were quantified in BMDMs infected at MOI 1, 5, and 10 at indicated time points. Values are average of at least 3 replicates from one experiment. (B) Levels of indicated metabolites were compared in BMDMs that were uninfected or infected with H37Rv at MOI 10, 72 hpi. Data are from one experiment with technical duplicates. (C) Cholesterol levels and (D) cell viability in IFN $\gamma$ -activated and naïve BMDMs that were uninfected or Mtb-infected at MOI 10 at the indicated time points. The cholesterol concentrations ( $\mu\text{g}/\text{mL}$ ) were normalized to protein concentration ( $\mu\text{g}/\text{mL}$ ) in the sample. Cholesterol values were not significantly different between samples except between uninfected 24h versus uninfected 120h ( $p=0.01$ ). (C, D) Plots show mean  $\pm$  s.e.m. from three independent experiments. \*\* $p=0.007$ , \*\*\*\* $p<0.0001$  calculated using one-way ANOVA with Tukey's multiple comparisons test in (C) and Dunnett's multiple comparisons test in (D). (E) Cholestenone was measured in IFN- $\gamma$ -activated and naïve BMDMs that were uninfected (UI) or infected with wild-type or  $\Delta$ *hsd* mutant Mtb at MOI 10 for 72 h. Plot shows mean  $\pm$  s.d. of one experiment ( $N=3$ ). The dotted line shows the limit of detection accuracy as determined by the standard curve (details in Supplemental Materials). (F-G) Bacterial CFU were quantified in PMA-differentiated THP-1 macrophages infected with wild-type or  $\Delta$ *hsd* mutant Mtb at MOI 5 to assess (F) bacterial uptake and (G) intracellular bacterial growth. Plot shows (F) mean  $\pm$  s.e.m. from three independent experiments measured 4 hours after bacterial addition and (G) mean  $\pm$  s.d. of five replicates of one experiment, representative of three independent experiments. For all macrophage experiments, one million cells were infected, and the samples were extracted in 500  $\mu\text{L}$  of 80 % methanol solution at indicated timepoints.

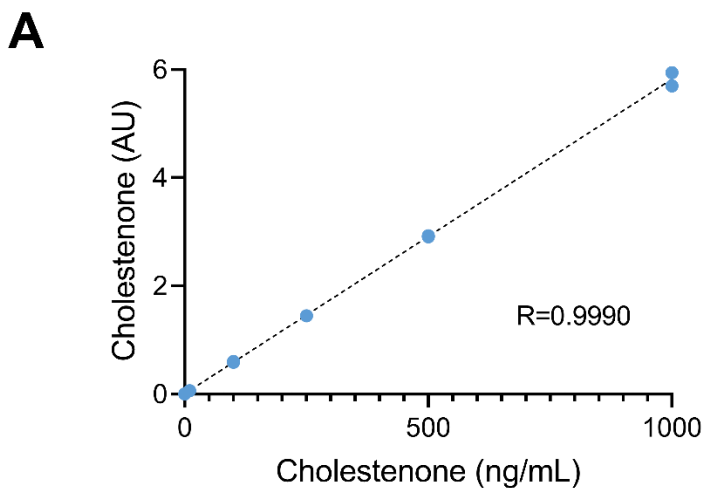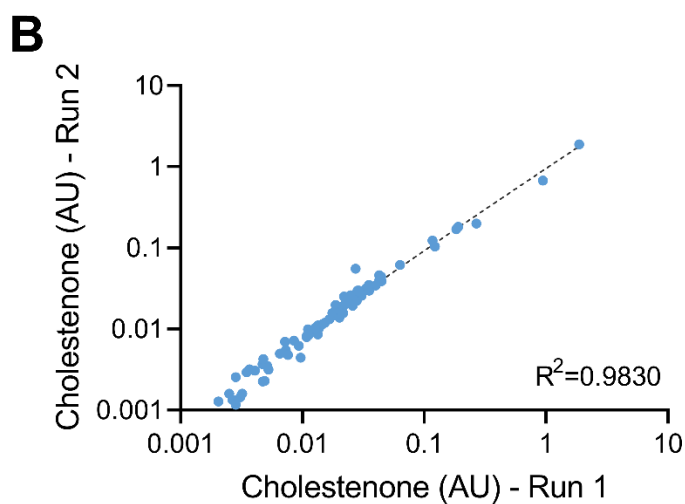

**Supplemental Figure 7. Standard curve for cholestenone quantification and correlation between replicates.** (A) The known concentration of cholestenone (ng/ml) was compared to area ratios calculated by mass spectrometry to establish a standard curve; the linear regression equation is as follows:  $y = 0.00593 x + 0.00163$  ( $r = 0.990$ ). (B) Cholestenone quantification is plotted on each axis for the results of two independent extractions (run 1 and run 2). R<sup>2</sup> obtained by linear regression. AU= arbitrary units, calculated from area ratio of metabolite peak versus internal standard.

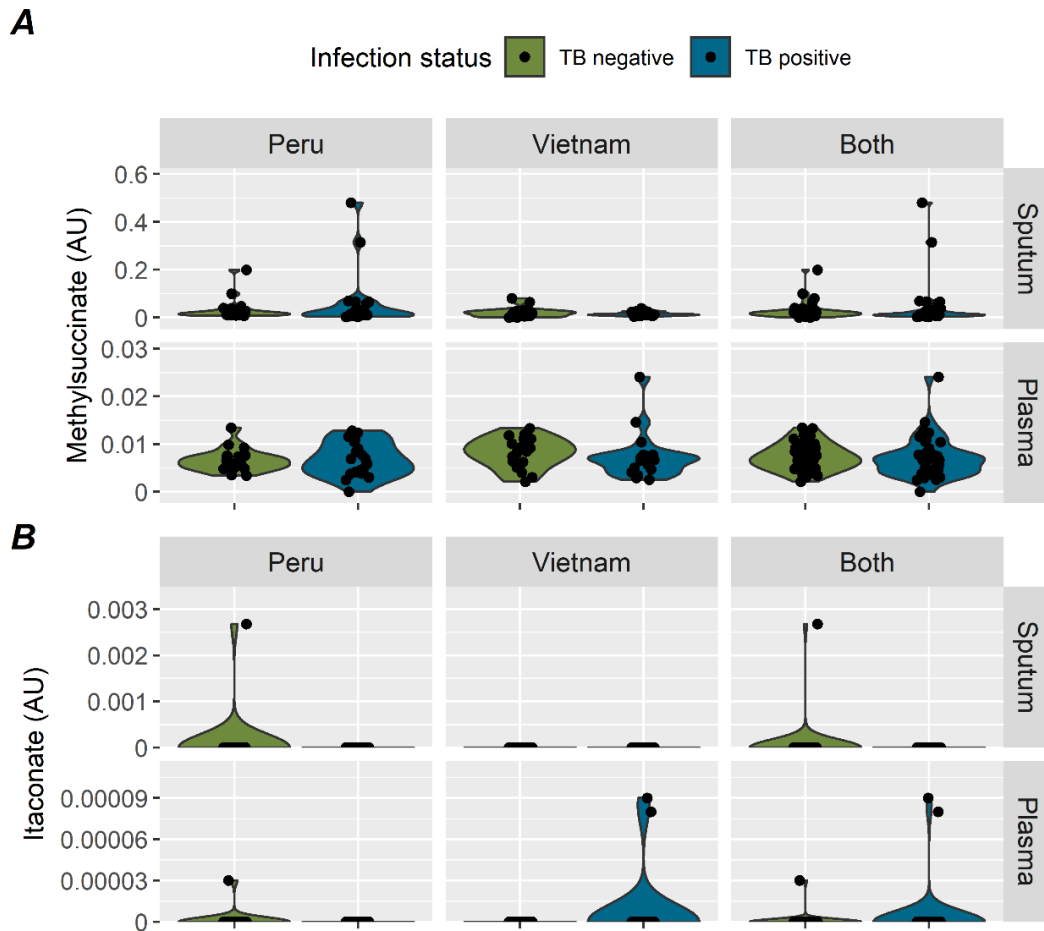

**Supplemental Figure 8. Methylsuccinate and itaconate levels do not correlate with Mtb infection status.** (A) Methylsuccinate and (B) itaconate levels in sputum and plasma samples plotted based on infection status. Statistical analyses were done using the Mann-Whitney test for sputum samples and Student's t-tests for plasma samples. AU= arbitrary units, calculated from area ratio of metabolite peak versus internal standard.

## Supplemental Tables

### Supplemental Table 1.

Included as a separate excel file.

### Supplemental Table 2. Summary statistics for clinical variables by country.

| Variable                             |             | Peru<br>(N = 40)   | Vietnam<br>(N = 40) | P value* |
|--------------------------------------|-------------|--------------------|---------------------|----------|
| Infection status                     | TB Negative | 20/40 (50%)        | 20/40 (50%)         | >0.999   |
|                                      | TB Positive | 20/40 (50%)        | 20/40 (50%)         |          |
| Sex                                  | Female      | 15/40 (38%)        | 12/40 (30%)         | 0.478    |
|                                      | Male        | 25/40 (62%)        | 28/40 (70%)         |          |
| Age, mean (SD);<br>range             |             | 32 (11.2)<br>19-56 | 49 (14.8)<br>20-77  | <0.001   |
| History of BCG vaccination           |             | 38/39 (97%)        | 22/32 (69%)         | 0.002    |
| History of active TB                 |             | 1/28 (4%)          | 8/40 (20%)          | 0.071    |
| Normal chest x-ray                   |             | 15/36 (42%)        | 0/40 (0%)           | <.001    |
| Chest pain                           |             | 31/40 (78%)        | 20/40 (50%)         | 0.011    |
| Dyspnea                              |             | 25/40 (63%)        | 22/40 (55%)         | 0.496    |
| Fever                                |             | 17/40 (43%)        | 25/40 (63%)         | 0.073    |
| Hemoptysis                           |             | 11/40 (28%)        | 9/40 (23%)          | 0.606    |
| Malaise                              |             | 39/40 (98%)        | 30/40 (75%)         | 0.007    |
| Night sweats                         |             | 16/40 (40%)        | 15/40 (38%)         | 0.818    |
| Cough                                |             | 40/40 (100%)       | 40/40 (100%)        | >0.999   |
| Recent weight loss<br>(without diet) |             | 22/40 (55%)        | 17/40 (43%)         | 0.263    |

Results reported as n (%) or mean (range). \* P values obtained using a chi-square test, Fisher's exact test, or t-test, as appropriate.

**Supplemental Table 3. Associations between metabolite abundance and clinical parameters for TB positive patients**

| <b>Outcome: Cholestenone in sputum (ng/mL)</b> |        |    |       |         |        |       |       |                      |
|------------------------------------------------|--------|----|-------|---------|--------|-------|-------|----------------------|
| Variable                                       | Group  | N  | Mean  | Std Dev | Median | Q1    | Q3    | P value <sup>†</sup> |
| Sex                                            | FEMALE | 11 | 331.3 | 949.3   | 24.6   | 5.0   | 46.3  | 0.355                |
|                                                | MALE   | 29 | 111.8 | 221.8   | 32.3   | 15.0  | 83.0  |                      |
| Chest Pain                                     | NO     | 16 | 336.0 | 812.2   | 29.3   | 19.4  | 208.3 | 0.288                |
|                                                | YES    | 24 | 62.9  | 84.1    | 30.2   | 7.9   | 74.8  |                      |
| Dyspnea                                        | NO     | 18 | 57.3  | 90.2    | 24.4   | 15.0  | 66.3  | 0.828                |
|                                                | YES    | 22 | 266.1 | 697.0   | 31.6   | 9.3   | 203.7 |                      |
| Fever                                          | NO     | 16 | 154.4 | 285.0   | 39.7   | 19.3  | 143.3 | 0.219                |
|                                                | YES    | 24 | 184.0 | 644.3   | 26.1   | 7.9   | 60.9  |                      |
| Hemoptysis                                     | NO     | 27 | 214.4 | 634.3   | 30.9   | 15.0  | 82.7  | 0.544                |
|                                                | YES    | 13 | 84.5  | 117.7   | 18.5   | 9.3   | 90.6  |                      |
| Night Sweats                                   | NO     | 19 | 123.8 | 265.6   | 28.1   | 13.9  | 82.7  | 0.828                |
|                                                | YES    | 21 | 215.9 | 686.3   | 30.9   | 10.6  | 90.6  |                      |
| Recent Weight Loss                             | NO     | 14 | 158.7 | 304.3   | 37.2   | 15.0  | 83.0  | 0.514                |
|                                                | YES    | 26 | 179.4 | 618.6   | 27.5   | 13.5  | 67.0  |                      |
| Sputum grade                                   | 2+     | 16 | 18.7  | 14.0    | 14.4   | 6.0   | 29.3  | 0.001                |
|                                                | 3+     | 24 | 274.5 | 664.1   | 66.7   | 23.8  | 242.7 |                      |
| <b>Outcome: Cholesterol in sputum (µg/mL)</b>  |        |    |       |         |        |       |       |                      |
| Variable                                       | Group  | N  | Mean  | Std Dev | Median | Q1    | Q3    | P value <sup>†</sup> |
| Sex                                            | FEMALE | 11 | 268.6 | 112.9   | 303.0  | 160.1 | 351.6 | 0.080                |
|                                                | MALE   | 29 | 196.5 | 113.3   | 164.2  | 99.0  | 308.7 |                      |
| Chest Pain                                     | NO     | 16 | 187.4 | 128.4   | 144.8  | 79.0  | 332.5 | 0.204                |
|                                                | YES    | 24 | 235.6 | 106.1   | 279.1  | 154.4 | 319.3 |                      |
| Dyspnea                                        | NO     | 18 | 206.4 | 117.8   | 187.4  | 121.7 | 313.8 | 0.631                |
|                                                | YES    | 22 | 224.5 | 117.3   | 266.9  | 114.2 | 339.2 |                      |
| Fever                                          | NO     | 16 | 197.0 | 122.0   | 162.1  | 85.6  | 325.2 | 0.398                |
|                                                | YES    | 24 | 229.2 | 113.3   | 266.9  | 128.7 | 327.1 |                      |
| Hemoptysis                                     | NO     | 27 | 217.9 | 117.6   | 227.9  | 114.2 | 324.7 | 0.902                |
|                                                | YES    | 13 | 213.0 | 118.6   | 214.8  | 142.8 | 339.2 |                      |
| Night Sweats                                   | NO     | 19 | 206.1 | 116.3   | 167.7  | 99.0  | 324.7 | 0.605                |
|                                                | YES    | 21 | 225.5 | 118.5   | 262.6  | 121.7 | 340.3 |                      |
| Recent Weight Loss                             | NO     | 14 | 182.2 | 120.3   | 148.7  | 72.2  | 297.1 | 0.176                |
|                                                | YES    | 26 | 234.7 | 112.3   | 266.9  | 142.8 | 339.2 |                      |
| Sputum grade                                   | 2+     | 16 | 228.4 | 110.2   | 249.5  | 128.7 | 332.5 | 0.599                |

|                                                | 3+     | 24 | 208.3 | 122.0   | 187.4  | 85.6  | 316.7  |                      |
|------------------------------------------------|--------|----|-------|---------|--------|-------|--------|----------------------|
| <b>Outcome: Cholestenone in plasma (ng/mL)</b> |        |    |       |         |        |       |        |                      |
| Variable                                       | Group  | N  | Mean  | Std Dev | Median | Q1    | Q3     | P value <sup>‡</sup> |
| Sex                                            | FEMALE | 11 | 16.9  | 9.3     | 12.3   | 10.4  | 20.6   | 0.690                |
|                                                | MALE   | 29 | 15.6  | 9.3     | 12.2   | 7.9   | 23.6   |                      |
| Chest Pain                                     | NO     | 16 | 15.9  | 10.2    | 12.3   | 8.0   | 22.6   | 0.976                |
|                                                | YES    | 24 | 16.0  | 8.7     | 12.9   | 8.3   | 23.6   |                      |
| Dyspnea                                        | NO     | 18 | 15.2  | 10.1    | 10.4   | 7.5   | 25.5   | 0.659                |
|                                                | YES    | 22 | 16.5  | 8.6     | 15.0   | 8.8   | 22.4   |                      |
| Fever                                          | NO     | 16 | 15.9  | 9.6     | 12.6   | 8.0   | 23.6   | 0.988                |
|                                                | YES    | 24 | 15.9  | 9.1     | 12.1   | 8.6   | 23.0   |                      |
| Hemoptysis                                     | NO     | 27 | 16.9  | 10.2    | 12.2   | 8.1   | 26.3   | 0.353                |
|                                                | YES    | 13 | 13.9  | 6.5     | 13.9   | 7.1   | 19.7   |                      |
| Night Sweats                                   | NO     | 19 | 14.4  | 9.0     | 11.6   | 7.9   | 19.7   | 0.336                |
|                                                | YES    | 21 | 17.3  | 9.4     | 16.1   | 8.7   | 23.6   |                      |
| Recent Weight Loss                             | NO     | 14 | 13.7  | 7.8     | 11.9   | 8.1   | 13.9   | 0.260                |
|                                                | YES    | 26 | 17.1  | 9.8     | 16.2   | 8.5   | 23.6   |                      |
| Sputum grade                                   | 2+     | 16 | 15.9  | 9.5     | 12.0   | 8.3   | 22.6   | 0.980                |
|                                                | 3+     | 24 | 16.0  | 9.2     | 12.6   | 8.1   | 23.6   |                      |
| <b>Outcome: Cholesterol in plasma (µg/mL)</b>  |        |    |       |         |        |       |        |                      |
| Variable                                       | Group  | N  | Mean  | Std Dev | Median | Q1    | Q3     | P value <sup>‡</sup> |
| Sex                                            | FEMALE | 11 | 831.5 | 239.9   | 834.5  | 681.0 | 897.6  | 0.767                |
|                                                | MALE   | 29 | 860.4 | 283.7   | 822.7  | 697.9 | 1029.8 |                      |
| Chest Pain                                     | NO     | 16 | 836.6 | 203.6   | 847.0  | 731.4 | 939.3  | 0.766                |
|                                                | YES    | 24 | 863.0 | 309.8   | 816.7  | 677.1 | 1021.4 |                      |
| Dyspnea                                        | NO     | 18 | 824.8 | 170.3   | 818.7  | 748.0 | 888.3  | 0.542                |
|                                                | YES    | 22 | 875.0 | 332.3   | 881.6  | 673.2 | 1052.6 |                      |
| Fever                                          | NO     | 16 | 845.8 | 221.8   | 818.7  | 731.4 | 981.3  | 0.901                |
|                                                | YES    | 24 | 856.9 | 302.0   | 850.2  | 677.1 | 979.5  |                      |
| Hemoptysis                                     | NO     | 27 | 915.0 | 244.3   | 871.8  | 783.9 | 1029.8 | 0.033                |
|                                                | YES    | 13 | 722.5 | 282.8   | 681.0  | 507.6 | 810.7  |                      |
| Night Sweats                                   | NO     | 19 | 850.9 | 284.4   | 814.8  | 698.8 | 932.8  | 0.973                |
|                                                | YES    | 21 | 853.8 | 262.7   | 865.8  | 681.0 | 1013.0 |                      |
| Recent Weight Loss                             | NO     | 14 | 919.9 | 334.7   | 850.2  | 685.2 | 1084.8 | 0.250                |
|                                                | YES    | 26 | 816.1 | 226.4   | 818.7  | 697.9 | 945.9  |                      |
| Sputum grade                                   | 2+     | 16 | 840.7 | 290.5   | 806.9  | 689.9 | 939.3  | 0.826                |
|                                                | 3+     | 24 | 860.2 | 261.0   | 825.4  | 691.6 | 1047.2 |                      |

Clinical parameters were assessed for statistical association with metabolite levels in samples from TB positive subjects of both countries (n=40). Metabolite abundance is reported in unprocessed samples (plasma or non-liquefied sputum). † Mann-Whitney test; ‡ t-test

161 **Supplemental Table 4. Cholesterol and cholestenone concentrations in clinical samples.**

| Cholesterol (µg/mL)    |         |                  |    |                              |        |       |        |
|------------------------|---------|------------------|----|------------------------------|--------|-------|--------|
| Sample type            | Country | Infection status | n  | Range                        | Mean   | SD    | Median |
| Plasma                 | Peru    | TB -             | 20 | 751.9 - 1577.7               | 1027.6 | 232.0 | 945.6  |
|                        |         | TB +             | 20 | 397.1 - 1368.3               | 791.8  | 270.9 | 740.7  |
|                        | Vietnam | TB -             | 20 | 883.1 - 1618.5               | 1190.5 | 241.1 | 1127.6 |
|                        |         | TB +             | 20 | 440.9 - 1701.0               | 913.1  | 261.1 | 881.7  |
| Sputum (non-liquefied) | Peru    | TB -             | 20 | 127.0 - 386.6                | 283.4  | 94.0  | 298.0  |
|                        |         | TB +             | 20 | 32.3 - 379.9                 | 283.7  | 109.6 | 325.2  |
|                        | Vietnam | TB -             | 20 | 6.0 - 386.0                  | 177.0  | 113.2 | 163.3  |
|                        |         | TB +             | 20 | 33.8 - 297.1                 | 149.0  | 79.0  | 144.8  |
| Cholestenone (ng/mL)   |         |                  |    |                              |        |       |        |
| Sample type            | Country | Infection status | n  | Range                        | Mean   | SD    | Median |
| Plasma                 | Peru    | TB -             | 20 | 5.1 - 31.7                   | 13.4   | 7.6   | 11.8   |
|                        |         | TB +             | 20 | 7.0 - 37.4                   | 22.1   | 7.9   | 23.0   |
|                        | Vietnam | TB -             | 20 | 5.5 - 20.3                   | 11.2   | 4.4   | 10.4   |
|                        |         | TB +             | 20 | 6.1 - 32.1                   | 9.8    | 5.6   | 8.3    |
| Sputum (non-liquefied) | Peru    | TB -             | 20 | < 5.0* <sup>1</sup> - 172.1  | 19.1   | 37.2  | 6.8    |
|                        |         | TB +             | 20 | < 5.0* <sup>2</sup> - 3183.5 | 290.7  | 728.2 | 27.1   |
|                        | Vietnam | TB -             | 20 | < 5.0* <sup>3</sup> - 14.2   | 6.0    | 2.4   | 5.0    |
|                        |         | TB +             | 20 | < 5.0* <sup>4</sup> - 399.7  | 53.6   | 84.9  | 29.5   |

162 Cholestenone concentration was determined as described in Supplemental Methods. 29 sputum samples have cholestenone values below 5 ng/ml, the 96% accuracy threshold, so were adjusted to 5 ng/ml for further statistical analysis. The number of such samples in each group is indicated by asterisks: \*<sup>1</sup> = 10/20, \*<sup>2</sup> = 3/20, \*<sup>3</sup> = 15/20, \*<sup>4</sup> = 1/20. SD: standard deviation. Metabolite abundance is reported in untreated samples (plasma or non-liquefied sputum).

163

**Supplemental Table 5. Strains and plasmids used in this study**

| Name                                                       | Characteristics                                                                                                          | Reference                |
|------------------------------------------------------------|--------------------------------------------------------------------------------------------------------------------------|--------------------------|
| <b><i>Mycobacterium tuberculosis</i> bacterial strains</b> |                                                                                                                          |                          |
| H37Rv                                                      | Reference strain                                                                                                         | Laboratory stocks        |
| $\Delta$ <i>hsd</i>                                        | Rv1106c::pKM464 derivative of H37Rv                                                                                      | This work                |
| $\Delta$ <i>choD</i>                                       | Rv3409c::pKM464 derivative of H37Rv                                                                                      | This work                |
| H37Rv<br><i>att</i> ::pCH89                                | H37Rv carrying the plasmid for chromosome complementation of the full <i>hsd</i> operon, as well as pKM461               | This work                |
| $\Delta$ <i>hsd</i><br><i>att</i> ::pCH89                  | $\Delta$ <i>hsd</i> carrying the plasmid for chromosome complementation of the full <i>hsd</i> operon, as well as pKM464 | This work                |
| <b>Plasmids</b>                                            |                                                                                                                          |                          |
| pKM461                                                     | P <sub>Tet</sub> -Che9c RecT-Bxb1 Int; SacRB; TetR, colE1, oriM; Kan <sup>R</sup>                                        | Addgene ID = 108320; (2) |
| pKM464                                                     | Bxb1 <i>attB</i> site; <i>catP</i> ; Hyg <sup>R</sup> ; colE1;                                                           | Addgene ID = 108322; (2) |
| pKP617                                                     | L5 integrating vector; Zeo <sup>R</sup>                                                                                  | (8)                      |
| pCH89                                                      | pKP617-ZeoR-Operon <sub>Rv1106c-Rv1109c</sub> (integrating vector)                                                       | This work                |

**Supplemental Table 6. Primers used in this study**

| Name                           | 5' Sequence                                                                                                                                                                   | 3' Sequence                    | Use                                                      |
|--------------------------------|-------------------------------------------------------------------------------------------------------------------------------------------------------------------------------|--------------------------------|----------------------------------------------------------|
| <b>Mutant construction</b>     |                                                                                                                                                                               |                                |                                                          |
| HC291                          | caccgcctcaccggcgagtcggtgaccatatccaacgaccgcacgcttctgatgcc<br>GGTTTGTCTGGTCAACCACCGCGGTCTCAGTGGTGTACGGTACAAACC<br>cgctgcagtatgacccctttacatcgggccagttaatcagtctctcaggtggcgtcagc   |                                | ORBIT<br>deletion of<br>Rv3409c                          |
| HC292                          | cgccagcgggtgtccgatgtgctggccggcgacgagggccaaaacggctaaggcaaggtt<br>GGTTTGTCTGGTCAACCACCGCGGTCTCAGTGGTGTACGGTACAAACC<br>ccagaattatctgaaactcaccactgctgccccaggtcgctcggtgtgtgctgcagc |                                | ORBIT<br>deletion of<br>Rv1106c                          |
| HC336                          |                                                                                                                                                                               | CGTCGGACGACCCGTTCCGG           | Screening<br>ORBIT<br>mediated<br>deletion of<br>Rv3409c |
| HC342                          |                                                                                                                                                                               | ccaccctacgttctctcgacg          |                                                          |
| HC338                          |                                                                                                                                                                               | CTGCCGGGACGAGCTGATGG           | Screening<br>ORBIT<br>mediated<br>deletion of<br>Rv1106c |
| HC343                          |                                                                                                                                                                               | GGGTACGGACGCGGTGGATC           |                                                          |
| <b>Complementation plasmid</b> |                                                                                                                                                                               |                                |                                                          |
| HC352                          | tatgcatcaattgattatc                                                                                                                                                           | GCAGTAGCCACGCGGCTC             | Cloning the<br>Rv1106c<br>region in<br>pKP617            |
| HC353                          | ggagtgggtcgataacttac                                                                                                                                                          | CTACGGCTTGACTGTGGCG            |                                                          |
| HC354                          |                                                                                                                                                                               | gtaagtatccgaccactc             |                                                          |
| HC355                          |                                                                                                                                                                               | gataaatcaattgatgcatattaattaatc |                                                          |
| HC366                          |                                                                                                                                                                               | GTCGTTACGGCTCTAGCTGATC         | Sequencing<br>the Rv1106c<br>genetic<br>region<br>cloned |
| HC367                          |                                                                                                                                                                               | AGCCGACAGTTCCGACGCCT           |                                                          |
| HC368                          |                                                                                                                                                                               | GGACCTGCTGCCGTTTTCTG           |                                                          |
| HC369                          |                                                                                                                                                                               | ggagcagggcggattggacc           |                                                          |
| HC370                          |                                                                                                                                                                               | gggaaacgcctggtatcttt           |                                                          |
